# Supplementary material
Source: PubMed Central journal article supplement (PMC3308721)
Supplement: NIHMS343023-supplement-Hua12-1-ESI.pdf [file NIHMS343023-supplement-Hua12-1-ESI.pdf]

Supporting Information for:

Structural and Photophysical Properties of Visible–  
and Near–Infrared–Emitting Tris Lanthanide(III)  
Complexes Formed with the Enantiomers of  
*N,N'*–bis(1–phenylethyl)  
–2,6–pyridinedicarboxamide

KimNgan T. Hua,<sup>†</sup> Jide Xu,<sup>‡</sup> Eliseo E. Quiroz,<sup>†</sup> Sabrina Lopez,<sup>†</sup> Andrew J. Ingram,<sup>†</sup> Victoria  
Anne Johnson,<sup>†</sup> Angela R. Tisch,<sup>†</sup> Ana de Bettencourt–Dias,<sup>#</sup> Daniel A. Straus,<sup>†</sup> and Gilles  
Muller\*<sup>†</sup>

<sup>†</sup> San José State University, Department of Chemistry, 1 Washington Square, San José, California  
95192–0101, United States

<sup>‡</sup> University of California, Berkeley, Department of Chemistry, Berkeley, California  
94720–1460, United States

<sup>#</sup> University of Nevada, Reno, Department of Chemistry, 1664 N. Virginia St., Reno, Nevada  
89557–0216, United States

\*: [gilles.muller@sjsu.edu](mailto:gilles.muller@sjsu.edu)

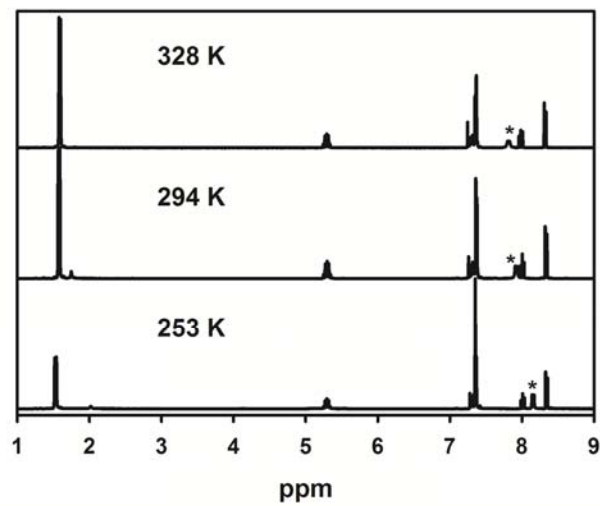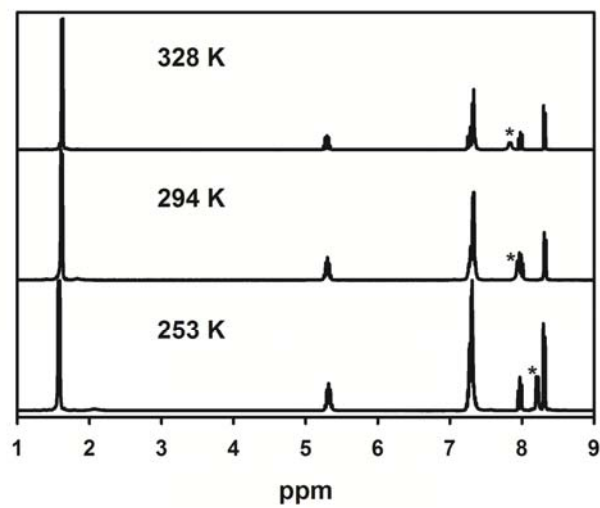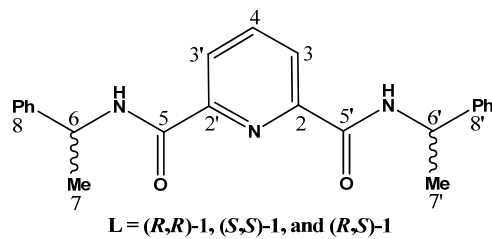

Figure S1. Variable Temperature  $^1\text{H}$ -NMR spectra of (*R,R*)-1 (top) and (*R,S*)-1 (bottom) in  $\text{CDCl}_3$ . The symbol \* denotes signal arising from the proton of the NH group.

**Table S1.** Selected Bond Lengths (Å) and Angles (deg) in (*R,S*)-**1** (Standard Deviation in Parentheses).

|             |          |             |          |                   |            |                    |            |
|-------------|----------|-------------|----------|-------------------|------------|--------------------|------------|
| O(1)-C(9)   | 1.228(3) | C(11)-C(12) | 1.377(3) | C(9)-N(1)-C(7)    | 123.7(2)   | N(2)-C(14)-C(15)   | 117.0(2)   |
| O(2)-C(15)  | 1.237(3) | C(12)-C(13) | 1.375(3) | C(10)-N(2)-C(14)  | 117.30(19) | C(13)-C(14)-C(15)  | 119.9(2)   |
| O(3)-C(32)  | 1.236(3) | C(13)-C(14) | 1.386(3) | C(15)-N(3)-C(16)  | 122.7(2)   | O(2)-C(15)-N(3)    | 124.3(2)   |
| O(4)-C(38)  | 1.236(3) | C(14)-C(15) | 1.506(3) | C(32)-N(4)-C(30)  | 122.31(19) | O(2)-C(15)-C(14)   | 120.4(2)   |
| N(1)-C(9)   | 1.327(3) | C(16)-C(17) | 1.502(4) | C(33)-N(5)-C(37)  | 116.84(19) | N(3)-C(15)-C(14)   | 115.3(2)   |
| N(1)-C(7)   | 1.467(3) | C(24)-C(25) | 1.378(3) | C(38)-N(6)-C(39)  | 120.68(19) | N(3)-C(16)-C(18A)  | 115.9(8)   |
| N(2)-C(10)  | 1.337(3) | C(24)-C(29) | 1.380(3) | C(6)-C(1)-C(2)    | 121.9(3)   | N(3)-C(16)-C(17)   | 110.0(2)   |
| N(2)-C(14)  | 1.342(3) | C(25)-C(26) | 1.373(4) | C(3)-C(2)-C(1)    | 120.0(3)   | C(18A)-C(16)-C(17) | 116.2(8)   |
| N(3)-C(15)  | 1.333(3) | C(26)-C(27) | 1.363(4) | C(2)-C(3)-C(4)    | 119.4(3)   | N(3)-C(16)-C(18B)  | 105.2(8)   |
| N(3)-C(16)  | 1.460(3) | C(27)-C(28) | 1.372(3) | C(3)-C(4)-C(5)    | 120.6(3)   | N(4)-C(30)-C(29)   | 112.32(19) |
| N(4)-C(32)  | 1.331(3) | C(28)-C(29) | 1.383(3) | C(6)-C(5)-C(4)    | 121.6(3)   | N(4)-C(30)-C(31)   | 111.09(19) |
| N(4)-C(30)  | 1.454(3) | C(29)-C(30) | 1.515(3) | C(5)-C(6)-C(1)    | 116.6(2)   | C(29)-C(30)-C(31)  | 110.60(19) |
| N(5)-C(33)  | 1.345(3) | C(30)-C(31) | 1.521(3) | C(5)-C(6)-C(7)    | 122.2(2)   | O(3)-C(32)-N(4)    | 123.9(2)   |
| N(5)-C(37)  | 1.345(3) | C(32)-C(33) | 1.497(3) | C(1)-C(6)-C(7)    | 121.2(2)   | O(3)-C(32)-C(33)   | 119.3(2)   |
| N(6)-C(38)  | 1.330(3) | C(33)-C(34) | 1.382(3) | N(1)-C(7)-C(8)    | 110.65(19) | N(4)-C(32)-C(33)   | 116.8(2)   |
| N(6)-C(39)  | 1.462(3) | C(34)-C(35) | 1.366(3) | N(1)-C(7)-C(6)    | 110.3(2)   | N(5)-C(33)-C(34)   | 122.6(2)   |
| C(1)-C(6)   | 1.375(4) | C(36)-C(37) | 1.373(3) | C(8)-C(7)-C(6)    | 114.8(2)   | N(5)-C(33)-C(32)   | 117.3(2)   |
| C(1)-C(2)   | 1.386(4) | C(37)-C(38) | 1.505(3) | O(1)-C(9)-N(1)    | 124.4(2)   | C(34)-C(33)-C(32)  | 120.1(2)   |
| C(2)-C(3)   | 1.350(4) | C(39)-C(41) | 1.515(3) | O(1)-C(9)-C(10)   | 119.6(2)   | C(35)-C(34)-C(33)  | 119.9(2)   |
| C(3)-C(4)   | 1.351(4) | C(39)-C(40) | 1.516(3) | N(1)-C(9)-C(10)   | 116.1(2)   | C(34)-C(35)-C(36)  | 118.2(2)   |
| C(4)-C(5)   | 1.385(4) | C(41)-C(46) | 1.372(3) | N(2)-C(10)-C(11)  | 122.8(2)   | C(37)-C(36)-C(35)  | 119.0(2)   |
| C(5)-C(6)   | 1.367(3) | C(41)-C(42) | 1.374(3) | N(2)-C(10)-C(9)   | 118.0(2)   | N(5)-C(37)-C(36)   | 123.5(2)   |
| C(6)-C(7)   | 1.511(3) | C(42)-C(43) | 1.389(4) | C(11)-C(10)-C(9)  | 119.1(2)   | N(5)-C(37)-C(38)   | 116.81(19) |
| C(7)-C(8)   | 1.508(3) | C(43)-C(44) | 1.372(4) | C(10)-C(11)-C(12) | 119.5(2)   | C(36)-C(37)-C(38)  | 119.7(2)   |
| C(9)-C(10)  | 1.509(3) | C(44)-C(45) | 1.347(5) | C(13)-C(12)-C(11) | 118.6(2)   | O(4)-C(38)-N(6)    | 123.5(2)   |
| C(10)-C(11) | 1.376(3) | C(45)-C(46) | 1.374(4) | C(12)-C(13)-C(14) | 118.7(2)   | O(4)-C(38)-C(37)   | 119.8(2)   |

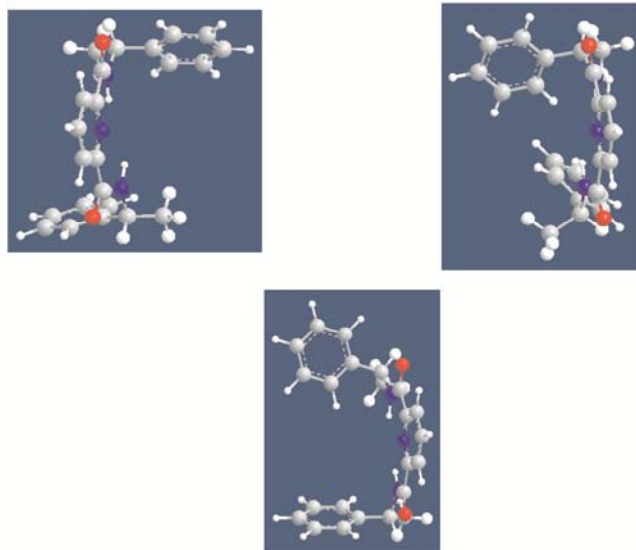

**Figure S2.** Geometric optimization of the three optical isomers of **1**, (*R,R*)-**1** (top left), (*S,S*)-**1** (top right), and (*R,S*)-**1** (bottom), as obtained by DFT B3LYP 6–31G(d) calculations.

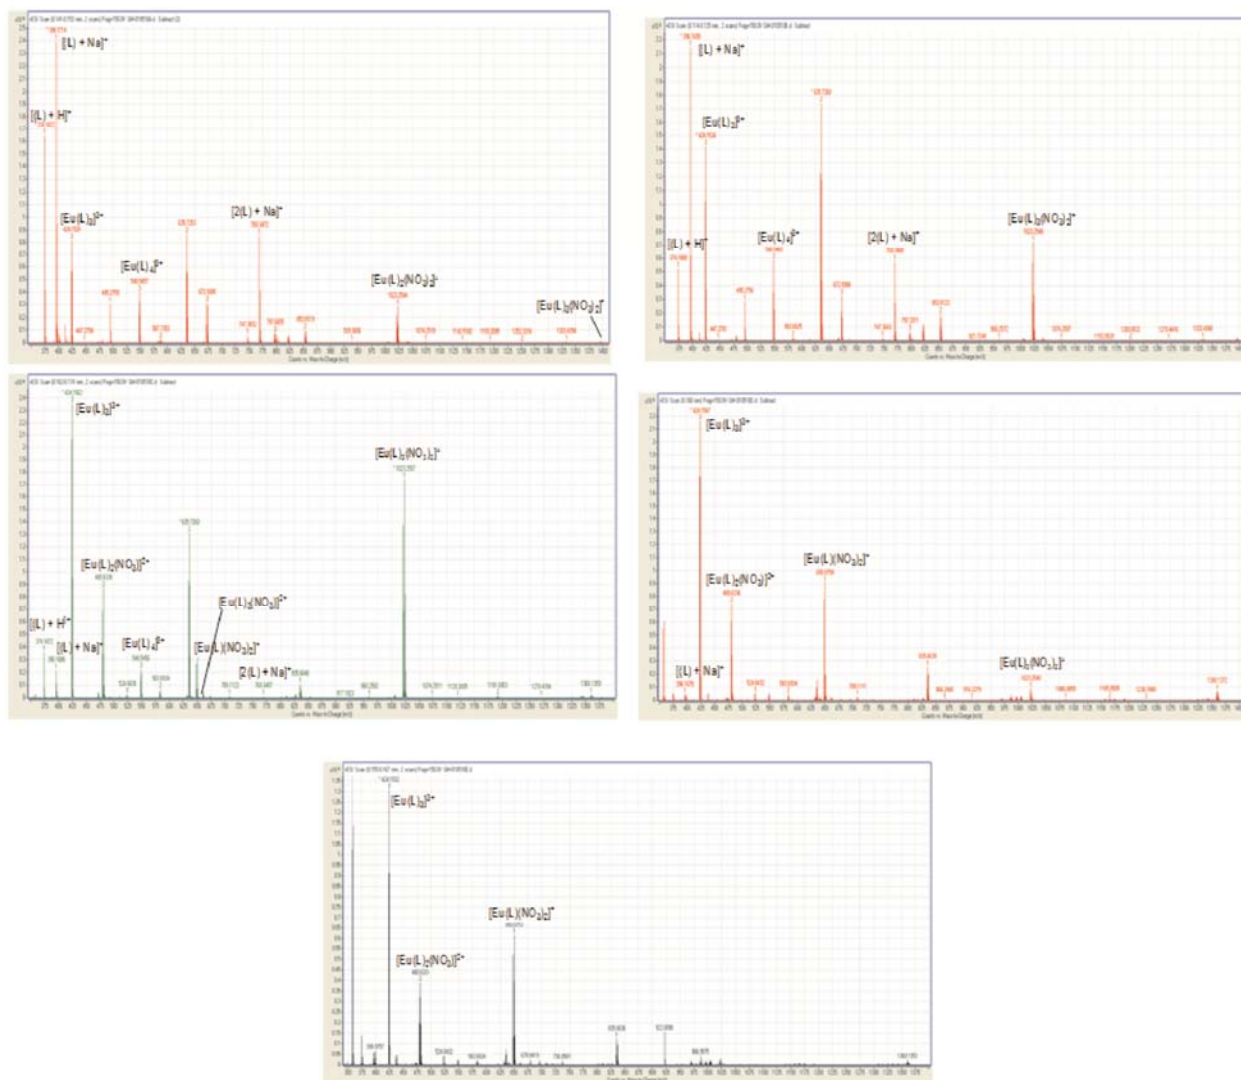

**Figure S3.** ES-MS spectra of Eu(III) and **L** in anhydrous MeCN at 298 K (**L** = (*R,R*)-**1**).

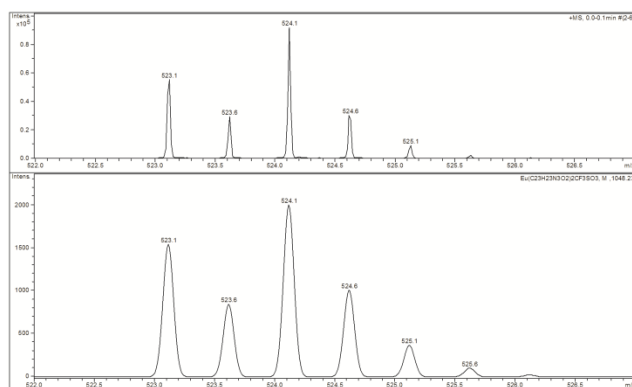

**Figure S4.** Detail of the ES-MS signal arising from the  $[EuL_3]^{3+}$  species observed in the ES-MS Spectra of Solutions ( $[L]_t = 2 \times 10^{-3}$  M in Anhydrous MeCN) with Ratios  $R = [Eu]_t/[L]_t = 0-4$  at 298 K (**L** = (*R,R*)-**1**).

**Table S2.** Species Observed in the ES–MS Spectra of Solutions ( $[L]_t = 2 \times 10^{-3}$  M in Anhydrous MeCN) with Ratios  $R = [Eu]_t/[L]_t = 0.25, 0.33, 0.5,$  and  $1.0$  at 298 K ( $L = (R,R)\text{-1}$ ).

| Species               | $m/z^a$ | Species                          | $m/z^a$ |
|-----------------------|---------|----------------------------------|---------|
| $[L + Na]^+$          | 396.2   | $[Eu(L)(Otf)(CH_3CN)_{12}]^{2+}$ | 583.7   |
| $[Eu(L)_3]^{3+}$      | 424.2   | $[Eu(L)_3(Otf)]^{2+}$            | 710.7   |
| $[Eu(L)_2(Otf)]^{2+}$ | 524.1   | $[Eu(L)_2(Otf)_2]^+$             | 667.2   |
| $[Eu(L)_4]^{3+}$      | 548.6   | $[Eu(L)_3(Otf)_2]^+$             | 1197.2  |

<sup>a</sup>  $m/z$  values given for the maximum of the peak at unit mass resolution where  $Otf^-$  denotes  $CF_3SO_3^-$ .

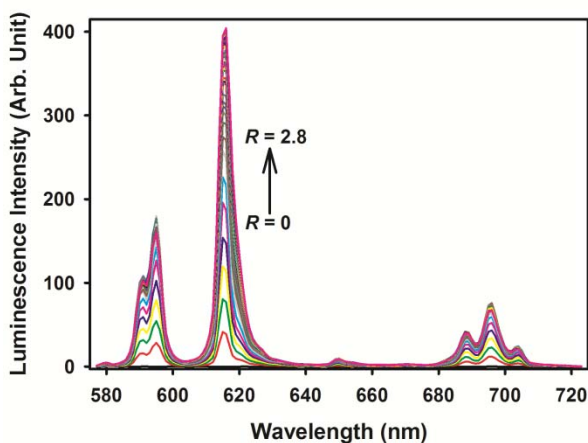

**Figure S5.** Time-resolved luminescence spectra obtained while titrating  $5.15 \times 10^{-5}$  M  $(R,R)\text{-1}$  with  $1.09 \times 10^{-3}$  M  $Eu(NO_3)_3$  at 298 K in anhydrous MeCN, in the presence of 0.05 M  $Et_4NClO_4$ , and under  $N_2$  atmosphere.  $R = [Eu]_t/[L]_t$ .

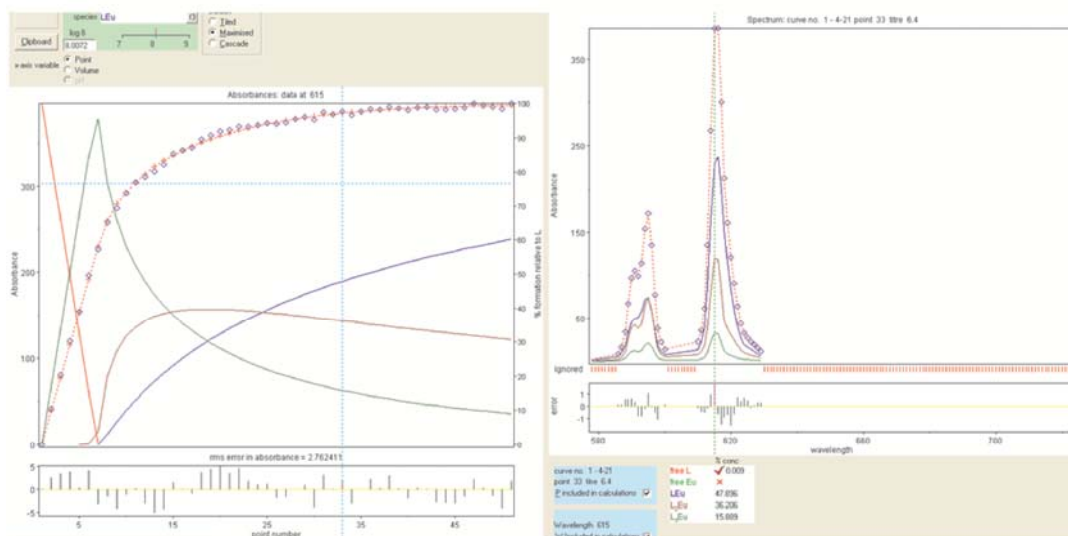

**Figure S6.** Example of Hyperquad2006 refinement data fits from a time-resolved luminescence titration of  $5.15 \times 10^{-5}$  M  $(R,R)\text{-1}$  with  $1.09 \times 10^{-3}$  M  $Eu(NO_3)_3$  in anhydrous MeCN ( $\mu = 0.05$  M  $Et_4NClO_4$ ) at 298 K and under  $N_2$  atmosphere.

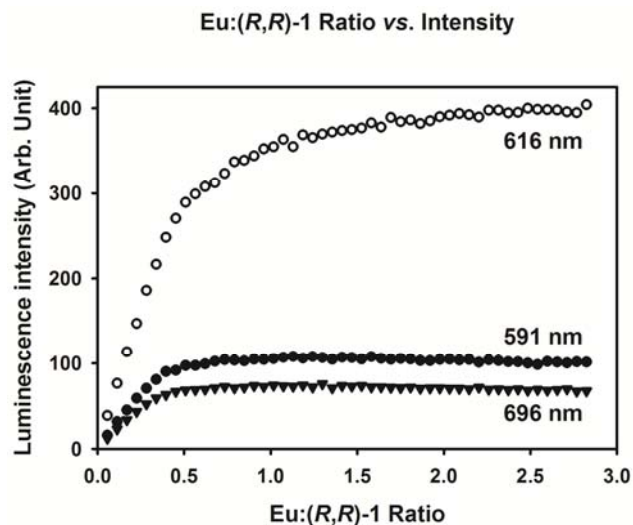

**Figure S7.** Luminescence intensity *vs.*  $R$  plots at various wavelengths during the time-resolved luminescence titration of  $5.15 \times 10^{-5}$  M (R,R)-1 with  $1.09 \times 10^{-3}$  M  $\text{Eu}(\text{NO}_3)_3$  in anhydrous MeCN ( $\mu = 0.05$  M  $\text{Et}_4\text{NClO}_4$ ) at 298 K and under  $\text{N}_2$  atmosphere.  $R = [\text{Eu}]_t/[(\text{R,R})-1]_t$ .

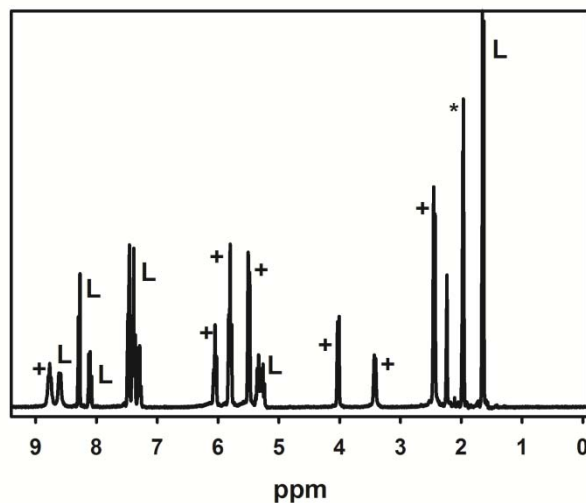

**Figure S8.**  $^1\text{H}$ -NMR spectrum of a solution containing a ratio,  $R = [\text{Eu}]_t/[\text{L}]_t$  of 0.2 in  $\text{CD}_3\text{CN}$  (\* symbol) at 298 K. The symbols L and + denote signals arising from the L and 1:3 species, respectively (L = (R,R)-1).

**Table S3.** Details of the Crystallographic Data Collection, Structural Determination, and Refinement for  $[\text{LnL}_3]^{3+}$  (Ln(III) = Eu, Gd, Tb, Yb and L = (R,R)-1 and/or (S,S)-1).

|                                 | $[\text{EuL}_3]^{3+}$ (L = (S,S)-1))                                     | $[\text{GdL}_3]^{3+}$ (L = (R,R)-1))                                     | $[\text{GdL}_3]^{3+}$ (L = (S,S)-1))                                     |
|---------------------------------|--------------------------------------------------------------------------|--------------------------------------------------------------------------|--------------------------------------------------------------------------|
| empirical formula               | $\text{C}_{70.88}\text{H}_{76.50}\text{Cl}_3\text{EuN}_9\text{O}_{7.88}$ | $\text{C}_{70.88}\text{H}_{76.50}\text{Cl}_3\text{GdN}_9\text{O}_{7.88}$ | $\text{C}_{70.88}\text{H}_{76.50}\text{Cl}_3\text{GdN}_9\text{O}_{7.88}$ |
| fw                              | 1438.72                                                                  | 1444.01                                                                  | 1444.01                                                                  |
| T (K)                           | 147(2)                                                                   | 151(2)                                                                   | 143(2)                                                                   |
| cryst syst                      | cubic                                                                    | cubic                                                                    | cubic                                                                    |
| space group                     | I23                                                                      | I23                                                                      | I23                                                                      |
| $a/\text{\AA}$                  | 25.965(2)                                                                | 25.967(2)                                                                | 25.955                                                                   |
| $b/\text{\AA}$                  | 25.965(2)                                                                | 25.967(2)                                                                | 25.955                                                                   |
| $c/\text{\AA}$                  | 25.965(2)                                                                | 25.967(2)                                                                | 25.955                                                                   |
| $\alpha/\text{deg}$             | 90                                                                       | 90                                                                       | 90                                                                       |
| $\beta/\text{deg}$              | 90                                                                       | 90                                                                       | 90                                                                       |
| $\gamma/\text{deg}$             | 90                                                                       | 90                                                                       | 90                                                                       |
| $V/\text{\AA}^3$                | 17505.1                                                                  | 17509.2                                                                  | 17484.9                                                                  |
| Z                               | 8                                                                        | 8                                                                        | 8                                                                        |
| abs coeff ( $\text{mm}^{-1}$ )  | 0.856                                                                    | 0.897                                                                    | 0.898                                                                    |
| $D/\text{mg}\cdot\text{m}^{-3}$ | 1.092                                                                    | 1.096                                                                    | 1.097                                                                    |
| reflns collected                | 40303                                                                    | 56168                                                                    | 82880                                                                    |
| unique reflns                   | 5358                                                                     | 5364                                                                     | 7003                                                                     |
| $R_{\text{int}}$                | 0.0316                                                                   | 0.0436                                                                   | 0.0420                                                                   |
| params                          | 278                                                                      | 341                                                                      | 275                                                                      |
| final R [ $I > 2\sigma(I)$ ]    | 0.0297                                                                   | 0.0271                                                                   | 0.0310                                                                   |
| wR2                             | 0.0816                                                                   | 0.0734                                                                   | 0.0787                                                                   |

**Table S4.** Details of the Crystallographic Data Collection, Structural Determination, and Refinement for  $[\text{LnL}_3]^{3+}$  (Ln(III) = Tb, Yb and L = (R,R)-1 and/or (S,S)-1).

|                                 | $[\text{TbL}_3]^{3+}$ (L = (R,R)-1))                                            | $[\text{TbL}_3]^{3+}$ (L = (S,S)-1))                                         | $[\text{YbL}_3]^{3+}$ (L = (S,S)-1))                                         |
|---------------------------------|---------------------------------------------------------------------------------|------------------------------------------------------------------------------|------------------------------------------------------------------------------|
| empirical formula               | $\text{C}_{70.50}\text{H}_{76.25}\text{Cl}_3\text{N}_9\text{O}_{7.50}\text{Tb}$ | $\text{C}_{71.50}\text{H}_{79}\text{Cl}_3\text{N}_9\text{O}_{8.50}\text{Tb}$ | $\text{C}_{71.50}\text{H}_{79}\text{Cl}_3\text{N}_9\text{O}_{8.50}\text{Yb}$ |
| fw                              | 1434.93                                                                         | 1465.71                                                                      | 1479.83                                                                      |
| T (K)                           | 151(2)                                                                          | 151(2)                                                                       | 131(2)                                                                       |
| cryst syst                      | cubic                                                                           | cubic                                                                        | cubic                                                                        |
| space group                     | I23                                                                             | I23                                                                          | I23                                                                          |
| $a/\text{\AA}$                  | 25.938(2)                                                                       | 25.942(2)                                                                    | 25.849                                                                       |
| $b/\text{\AA}$                  | 25.938(2)                                                                       | 25.942(2)                                                                    | 25.949                                                                       |
| $c/\text{\AA}$                  | 25.938(2)                                                                       | 25.942(2)                                                                    | 25.949                                                                       |
| $\alpha/\text{deg}$             | 90                                                                              | 90                                                                           | 90                                                                           |
| $\beta/\text{deg}$              | 90                                                                              | 90                                                                           | 90                                                                           |
| $\gamma/\text{deg}$             | 90                                                                              | 90                                                                           | 90                                                                           |
| $V/\text{\AA}^3$                | 17450.6                                                                         | 17458.6                                                                      | 17271.5                                                                      |
| Z                               | 8                                                                               | 8                                                                            | 8                                                                            |
| abs coeff ( $\text{mm}^{-1}$ )  | 0.950                                                                           | 0.951                                                                        | 1.226                                                                        |
| $D/\text{mg}\cdot\text{m}^{-3}$ | 1.092                                                                           | 1.115                                                                        | 1.138                                                                        |
| reflns collected                | 103517                                                                          | 35964                                                                        | 56820                                                                        |
| unique reflns                   | 5337                                                                            | 5329                                                                         | 5277                                                                         |
| $R_{\text{int}}$                | 0.0406                                                                          | 0.0308                                                                       | 0.0307                                                                       |
| params                          | 274                                                                             | 279                                                                          | 278                                                                          |
| final R [ $I > 2\sigma(I)$ ]    | 0.0219                                                                          | 0.0227                                                                       | 0.0193                                                                       |
| wR2                             | 0.0597                                                                          | 0.0637                                                                       | 0.0515                                                                       |

**Table S5.** Selected Bond Lengths (Å) and Angles (deg) in  $\Delta$ -[Eu((S,S)-1)<sub>3</sub>]<sup>3+</sup> (Standard Deviation in Parentheses).

|                     |            |
|---------------------|------------|
| N(2)-Eu(1)          | 2.555(3)   |
| Eu(1)-O(1)#1        | 2.388(2)   |
| Eu(1)-O(1)#2        | 2.388(2)   |
| Eu(1)-O(1)          | 2.388(2)   |
| Eu(1)-O(2)          | 2.404(2)   |
| Eu(1)-O(2)#1        | 2.404(2)   |
| Eu(1)-O(2)#2        | 2.404(2)   |
| Eu(1)-N(2)#1        | 2.555(3)   |
| Eu(1)-N(2)#2        | 2.555(3)   |
|                     |            |
| C(10)-N(2)-Eu(1)    | 119.6(2)   |
| C(14)-N(2)-Eu(1)    | 120.1(2)   |
| C(15)-N(3)-C(16)    | 122.7(3)   |
| O(1)#1-Eu(1)-O(1)#2 | 81.05(9)   |
| O(1)#1-Eu(1)-O(1)   | 81.05(9)   |
| O(1)#2-Eu(1)-O(1)   | 81.05(9)   |
| O(1)#1-Eu(1)-O(2)   | 144.99(8)  |
| O(1)#2-Eu(1)-O(2)   | 82.72(8)   |
| O(1)-Eu(1)-O(2)     | 126.53(8)  |
| O(1)#1-Eu(1)-O(2)#1 | 126.53(8)  |
| O(1)#2-Eu(1)-O(2)#1 | 144.99(8)  |
| O(1)-Eu(1)-O(2)#1   | 82.72(8)   |
| O(2)-Eu(1)-O(2)#1   | 82.41(9)   |
| O(1)#1-Eu(1)-O(2)#2 | 82.72(8)   |
| O(1)#2-Eu(1)-O(2)#2 | 126.53(8)  |
| O(1)-Eu(1)-O(2)#2   | 144.99(8)  |
| O(2)-Eu(1)-O(2)#2   | 82.41(9)   |
| O(2)#1-Eu(1)-O(2)#2 | 82.41(9)   |
| O(1)#1-Eu(1)-N(2)#1 | 63.30(8)   |
| O(1)#2-Eu(1)-N(2)#1 | 139.19(9)  |
| O(1)-Eu(1)-N(2)#1   | 74.66(8)   |
| O(2)-Eu(1)-N(2)#1   | 138.04(9)  |
| O(2)#1-Eu(1)-N(2)#1 | 63.30(8)   |
| O(2)#2-Eu(1)-N(2)#1 | 70.33(8)   |
| O(1)#1-Eu(1)-N(2)   | 139.19(9)  |
| O(1)#2-Eu(1)-N(2)   | 74.66(8)   |
| O(1)-Eu(1)-N(2)     | 63.30(8)   |
| O(2)-Eu(1)-N(2)     | 63.30(8)   |
| O(2)#1-Eu(1)-N(2)   | 70.33(8)   |
| O(2)#2-Eu(1)-N(2)   | 138.04(9)  |
| N(2)#1-Eu(1)-N(2)   | 119.953(5) |
| O(1)#1-Eu(1)-N(2)#2 | 74.66(8)   |
| O(1)#2-Eu(1)-N(2)#2 | 63.30(8)   |
| O(1)-Eu(1)-N(2)#2   | 139.19(9)  |
| O(2)-Eu(1)-N(2)#2   | 70.33(8)   |
| O(2)#1-Eu(1)-N(2)#2 | 138.04(9)  |
| O(2)#2-Eu(1)-N(2)#2 | 63.30(8)   |
| N(2)#1-Eu(1)-N(2)#2 | 119.953(5) |
| N(2)-Eu(1)-N(2)#2   | 119.953(5) |
| C(9)-O(1)-Eu(1)     | 125.7(2)   |
| C(15)-O(2)-Eu(1)    | 125.8(2)   |

Symmetry transformations used to generate equivalent atoms:

#1 -z+1,x+1,y #2 -y+1,z,-x+1 #3 -x+1,-y,z



**Table S6.** Selected Bond Lengths (Å) and Angles (deg) in  $\Lambda$ -[Gd((R,R)-1)<sub>3</sub>]<sup>3+</sup> (Standard Deviation in Parentheses).

|                     |            |
|---------------------|------------|
| N(2)-Gd(1)          | 2.543(2)   |
| O(1)-Gd(1)          | 2.393(2)   |
| O(2)-Gd(1)          | 2.3811(18) |
| Gd(1)-O(2)#1        | 2.3811(18) |
| Gd(1)-O(2)#2        | 2.3811(18) |
| Gd(1)-O(1)#1        | 2.393(2)   |
| Gd(1)-O(1)#2        | 2.393(2)   |
| Gd(1)-N(2)#1        | 2.543(2)   |
| Gd(1)-N(2)#2        | 2.543(2)   |
|                     |            |
| C(10)-N(2)-Gd(1)    | 119.74(19) |
| C(14)-N(2)-Gd(1)    | 120.54(18) |
| C(15)-O(1)-Gd(1)    | 125.93(18) |
| C(9)-O(2)-Gd(1)     | 125.33(19) |
| O(2)#1-Gd(1)-O(2)#2 | 80.86(8)   |
| O(2)#1-Gd(1)-O(2)   | 80.86(8)   |
| O(2)#2-Gd(1)-O(2)   | 80.86(8)   |
| O(2)#1-Gd(1)-O(1)#1 | 127.02(7)  |
| O(2)#2-Gd(1)-O(1)#1 | 144.74(7)  |
| O(2)-Gd(1)-O(1)#1   | 83.03(7)   |
| O(2)#1-Gd(1)-O(1)   | 144.74(7)  |
| O(2)#2-Gd(1)-O(1)   | 83.03(7)   |
| O(2)-Gd(1)-O(1)     | 127.02(7)  |
| O(1)#1-Gd(1)-O(1)   | 82.04(8)   |
| O(2)#1-Gd(1)-O(1)#2 | 83.03(7)   |
| O(2)#2-Gd(1)-O(1)#2 | 127.02(7)  |
| O(2)-Gd(1)-O(1)#2   | 144.74(7)  |
| O(1)#1-Gd(1)-O(1)#2 | 82.04(8)   |
| O(1)-Gd(1)-O(1)#2   | 82.04(8)   |
| O(2)#1-Gd(1)-N(2)   | 139.18(8)  |
| O(2)#2-Gd(1)-N(2)   | 74.54(7)   |
| O(2)-Gd(1)-N(2)     | 63.61(7)   |
| O(1)#1-Gd(1)-N(2)   | 70.20(7)   |
| O(1)-Gd(1)-N(2)     | 63.49(7)   |
| O(1)#2-Gd(1)-N(2)   | 137.74(8)  |
| O(2)#1-Gd(1)-N(2)#1 | 63.61(7)   |
| O(2)#2-Gd(1)-N(2)#1 | 139.18(8)  |
| O(2)-Gd(1)-N(2)#1   | 74.54(7)   |
| O(1)#1-Gd(1)-N(2)#1 | 63.49(7)   |
| O(1)-Gd(1)-N(2)#1   | 137.74(8)  |
| O(1)#2-Gd(1)-N(2)#1 | 70.20(7)   |
| N(2)-Gd(1)-N(2)#1   | 119.948(4) |
| O(2)#1-Gd(1)-N(2)#2 | 74.54(7)   |
| O(2)#2-Gd(1)-N(2)#2 | 63.61(7)   |
| O(2)-Gd(1)-N(2)#2   | 139.18(8)  |
| O(1)#1-Gd(1)-N(2)#2 | 137.74(8)  |
| O(1)-Gd(1)-N(2)#2   | 70.20(7)   |
| O(1)#2-Gd(1)-N(2)#2 | 63.49(7)   |
| N(2)-Gd(1)-N(2)#2   | 119.947(4) |
| N(2)#1-Gd(1)-N(2)#2 | 119.948(4) |

Symmetry transformations used to generate equivalent atoms:

#1 y,z,x #2 z,x,y #3 -x+1,-y+2,z

**Table S7.** Selected Bond Lengths (Å) and Angles (deg) in  $\Delta$ -[Gd((S,S)-1)<sub>3</sub>]<sup>3+</sup> (Standard Deviation in Parentheses).

|                     |            |
|---------------------|------------|
| N(2)-Gd(1)          | 2.541(2)   |
| O(1)-Gd(1)          | 2.3751(16) |
| O(2)-Gd(1)          | 2.3962(18) |
| Gd(1)-O(1)#1        | 2.3751(16) |
| Gd(1)-O(1)#2        | 2.3751(16) |
| Gd(1)-O(2)#1        | 2.3962(18) |
| Gd(1)-O(2)#2        | 2.3962(18) |
| Gd(1)-N(2)#1        | 2.541(2)   |
| Gd(1)-N(2)#2        | 2.541(2)   |
|                     |            |
| C(14)-N(2)-Gd(1)    | 120.61(16) |
| C(10)-N(2)-Gd(1)    | 119.57(16) |
| C(9)-O(1)-Gd(1)     | 125.70(16) |
| C(15)-O(2)-Gd(1)    | 125.74(16) |
| O(1)#1-Gd(1)-O(1)   | 80.68(7)   |
| O(1)#1-Gd(1)-O(1)#2 | 80.68(7)   |
| O(1)-Gd(1)-O(1)#2   | 80.68(7)   |
| O(1)#1-Gd(1)-O(2)#1 | 127.16(6)  |
| O(1)-Gd(1)-O(2)#1   | 83.14(7)   |
| O(1)#2-Gd(1)-O(2)#1 | 144.68(6)  |
| O(1)#1-Gd(1)-O(2)#2 | 83.14(7)   |
| O(1)-Gd(1)-O(2)#2   | 144.68(6)  |
| O(1)#2-Gd(1)-O(2)#2 | 127.16(6)  |
| O(2)#1-Gd(1)-O(2)#2 | 82.02(8)   |
| O(1)#1-Gd(1)-O(2)   | 144.68(6)  |
| O(1)-Gd(1)-O(2)     | 127.16(6)  |
| O(1)#2-Gd(1)-O(2)   | 83.14(7)   |
| O(2)#1-Gd(1)-O(2)   | 82.02(8)   |
| O(2)#2-Gd(1)-O(2)   | 82.02(8)   |
| O(1)#1-Gd(1)-N(2)#1 | 63.74(7)   |
| O(1)-Gd(1)-N(2)#1   | 74.44(6)   |
| O(1)#2-Gd(1)-N(2)#1 | 139.06(7)  |
| O(2)#1-Gd(1)-N(2)#1 | 63.50(6)   |
| O(2)#2-Gd(1)-N(2)#1 | 70.25(7)   |
| O(2)-Gd(1)-N(2)#1   | 137.76(7)  |
| O(1)#1-Gd(1)-N(2)   | 139.06(7)  |
| O(1)-Gd(1)-N(2)     | 63.74(7)   |
| O(1)#2-Gd(1)-N(2)   | 74.44(6)   |
| O(2)#1-Gd(1)-N(2)   | 70.25(7)   |
| O(2)#2-Gd(1)-N(2)   | 137.76(7)  |
| O(2)-Gd(1)-N(2)     | 63.50(6)   |
| N(2)#1-Gd(1)-N(2)   | 119.950(4) |
| O(1)#1-Gd(1)-N(2)#2 | 74.44(6)   |
| O(1)-Gd(1)-N(2)#2   | 139.06(7)  |
| O(1)#2-Gd(1)-N(2)#2 | 63.74(7)   |
| O(2)#1-Gd(1)-N(2)#2 | 137.76(7)  |
| O(2)#2-Gd(1)-N(2)#2 | 63.50(6)   |
| O(2)-Gd(1)-N(2)#2   | 70.25(7)   |
| N(2)#1-Gd(1)-N(2)#2 | 119.950(4) |
| N(2)-Gd(1)-N(2)#2   | 119.950(4) |

Symmetry transformations used to generate equivalent atoms:

#1 y,z,x #2 z,x,y #3 -x,y,-z+1

Table S8. Selected Bond Lengths (Å) and Angles (deg) in  $\Lambda$ -[Tb((R,R)-1)<sub>3</sub>]<sup>3+</sup> (Standard Deviation in Parentheses).

|                     |            |
|---------------------|------------|
| N(2)-Tb(1)          | 2.5278(19) |
| O(1)-Tb(1)          | 2.3813(17) |
| O(2)-Tb(1)          | 2.3723(16) |
| Tb(1)-O(2)#1        | 2.3723(16) |
| Tb(1)-O(2)#2        | 2.3723(16) |
| Tb(1)-O(1)#2        | 2.3813(17) |
| Tb(1)-O(1)#1        | 2.3813(17) |
| Tb(1)-N(2)#2        | 2.5278(19) |
| Tb(1)-N(2)#1        | 2.5278(19) |
|                     |            |
| C(14)-N(2)-Tb(1)    | 120.68(15) |
| C(10)-N(2)-Tb(1)    | 119.55(15) |
| C(15)-O(1)-Tb(1)    | 126.07(16) |
| C(9)-O(2)-Tb(1)     | 125.37(16) |
| O(2)#1-Tb(1)-O(2)#2 | 80.88(7)   |
| O(2)#1-Tb(1)-O(2)   | 80.88(7)   |
| O(2)#2-Tb(1)-O(2)   | 80.88(7)   |
| O(2)#1-Tb(1)-O(1)#2 | 82.87(6)   |
| O(2)#2-Tb(1)-O(1)#2 | 127.54(6)  |
| O(2)-Tb(1)-O(1)#2   | 144.14(6)  |
| O(2)#1-Tb(1)-O(1)   | 144.14(6)  |
| O(2)#2-Tb(1)-O(1)   | 82.87(6)   |
| O(2)-Tb(1)-O(1)     | 127.54(6)  |
| O(1)#2-Tb(1)-O(1)   | 82.12(7)   |
| O(2)#1-Tb(1)-O(1)#1 | 127.54(6)  |
| O(2)#2-Tb(1)-O(1)#1 | 144.14(6)  |
| O(2)-Tb(1)-O(1)#1   | 82.87(6)   |
| O(1)#2-Tb(1)-O(1)#1 | 82.12(7)   |
| O(1)-Tb(1)-O(1)#1   | 82.12(7)   |
| O(2)#1-Tb(1)-N(2)#2 | 74.16(6)   |
| O(2)#2-Tb(1)-N(2)#2 | 64.04(6)   |
| O(2)-Tb(1)-N(2)#2   | 139.35(6)  |
| O(1)#2-Tb(1)-N(2)#2 | 63.56(6)   |
| O(1)-Tb(1)-N(2)#2   | 69.99(6)   |
| O(1)#1-Tb(1)-N(2)#2 | 137.74(7)  |
| O(2)#1-Tb(1)-N(2)#1 | 64.04(6)   |
| O(2)#2-Tb(1)-N(2)#1 | 139.35(6)  |
| O(2)-Tb(1)-N(2)#1   | 74.16(6)   |
| O(1)#2-Tb(1)-N(2)#1 | 69.99(6)   |
| O(1)-Tb(1)-N(2)#1   | 137.74(7)  |
| O(1)#1-Tb(1)-N(2)#1 | 63.56(6)   |
| N(2)#2-Tb(1)-N(2)#1 | 119.942(4) |
| O(2)#1-Tb(1)-N(2)   | 139.35(6)  |
| O(2)#2-Tb(1)-N(2)   | 74.16(6)   |
| O(2)-Tb(1)-N(2)     | 64.04(6)   |
| O(1)#2-Tb(1)-N(2)   | 137.74(7)  |
| O(1)-Tb(1)-N(2)     | 63.56(6)   |
| O(1)#1-Tb(1)-N(2)   | 69.99(6)   |
| N(2)#2-Tb(1)-N(2)   | 119.942(4) |
| N(2)#1-Tb(1)-N(2)   | 119.942(4) |

Symmetry transformations used to generate equivalent atoms:

#1 y,z,x #2 z,x,y #3 -x+2,y,-z+1

**Table S9.** Selected Bond Lengths (Å) and Angles (deg) in  $\Delta$ -[Tb((S,S)-1)<sub>3</sub>]<sup>3+</sup> (Standard Deviation in Parentheses).

|                     |            |
|---------------------|------------|
| N(2)-Tb(1)          | 2.528(2)   |
| O(1)-Tb(1)          | 2.3657(16) |
| O(2)-Tb(1)          | 2.3817(17) |
| Tb(1)-O(1)#1        | 2.3657(16) |
| Tb(1)-O(1)#2        | 2.3657(16) |
| Tb(1)-O(2)#1        | 2.3817(17) |
| Tb(1)-O(2)#2        | 2.3817(17) |
| Tb(1)-N(2)#1        | 2.528(2)   |
| Tb(1)-N(2)#2        | 2.528(2)   |
|                     |            |
| C(14)-N(2)-Tb(1)    | 120.39(16) |
| C(10)-N(2)-Tb(1)    | 119.57(16) |
| C(9)-O(1)-Tb(1)     | 125.44(16) |
| C(15)-O(2)-Tb(1)    | 125.96(16) |
| O(1)-Tb(1)-O(1)#1   | 80.81(7)   |
| O(1)-Tb(1)-O(1)#2   | 80.81(7)   |
| O(1)#1-Tb(1)-O(1)#2 | 80.81(7)   |
| O(1)-Tb(1)-O(2)#1   | 144.21(6)  |
| O(1)#1-Tb(1)-O(2)#1 | 127.50(6)  |
| O(1)#2-Tb(1)-O(2)#1 | 82.91(6)   |
| O(1)-Tb(1)-O(2)     | 127.50(6)  |
| O(1)#1-Tb(1)-O(2)   | 82.91(6)   |
| O(1)#2-Tb(1)-O(2)   | 144.21(6)  |
| O(2)#1-Tb(1)-O(2)   | 82.13(7)   |
| O(1)-Tb(1)-O(2)#2   | 82.91(6)   |
| O(1)#1-Tb(1)-O(2)#2 | 144.21(6)  |
| O(1)#2-Tb(1)-O(2)#2 | 127.50(6)  |
| O(2)#1-Tb(1)-O(2)#2 | 82.13(7)   |
| O(2)-Tb(1)-O(2)#2   | 82.13(7)   |
| O(1)-Tb(1)-N(2)     | 63.95(6)   |
| O(1)#1-Tb(1)-N(2)   | 74.11(6)   |
| O(1)#2-Tb(1)-N(2)   | 139.17(7)  |
| O(2)#1-Tb(1)-N(2)   | 137.87(7)  |
| O(2)-Tb(1)-N(2)     | 63.62(6)   |
| O(2)#2-Tb(1)-N(2)   | 70.11(7)   |
| O(1)-Tb(1)-N(2)#1   | 139.17(7)  |
| O(1)#1-Tb(1)-N(2)#1 | 63.95(6)   |
| O(1)#2-Tb(1)-N(2)#1 | 74.11(6)   |
| O(2)#1-Tb(1)-N(2)#1 | 63.62(6)   |
| O(2)-Tb(1)-N(2)#1   | 70.11(7)   |
| O(2)#2-Tb(1)-N(2)#1 | 137.87(7)  |
| N(2)-Tb(1)-N(2)#1   | 119.952(4) |
| O(1)-Tb(1)-N(2)#2   | 74.11(6)   |
| O(1)#1-Tb(1)-N(2)#2 | 139.17(7)  |
| O(1)#2-Tb(1)-N(2)#2 | 63.95(6)   |
| O(2)#1-Tb(1)-N(2)#2 | 70.11(7)   |
| O(2)-Tb(1)-N(2)#2   | 137.87(7)  |
| O(2)#2-Tb(1)-N(2)#2 | 63.62(6)   |
| N(2)-Tb(1)-N(2)#2   | 119.952(4) |
| N(2)#1-Tb(1)-N(2)#2 | 119.952(4) |

Symmetry transformations used to generate equivalent atoms:

#1 -y+1,z,-x+1 #2 -z+1,-x+1,y #3 -x+1,-y,z

**Table S10.** Selected Bond Lengths (Å) and Angles (deg) in  $\Delta$ -[Yb((S,S)-1)<sub>3</sub>]<sup>3+</sup> (Standard Deviation in Parentheses).

|                     |            |
|---------------------|------------|
| N(2)-Yb(1)          | 2.469(2)   |
| O(1)-Yb(1)          | 2.3205(15) |
| O(2)-Yb(1)          | 2.3310(17) |
| Yb(1)-O(1)#1        | 2.3205(15) |
| Yb(1)-O(1)#2        | 2.3205(15) |
| Yb(1)-O(2)#1        | 2.3310(17) |
| Yb(1)-O(2)#2        | 2.3310(17) |
| Yb(1)-N(2)#1        | 2.469(2)   |
| Yb(1)-N(2)#2        | 2.469(2)   |
|                     |            |
| C(10)-N(2)-Yb(1)    | 120.08(16) |
| C(14)-N(2)-Yb(1)    | 120.52(15) |
| C(9)-O(1)-Yb(1)     | 124.93(15) |
| C(15)-O(2)-Yb(1)    | 125.51(16) |
| O(1)#1-Yb(1)-O(1)   | 79.98(6)   |
| O(1)#1-Yb(1)-O(1)#2 | 79.98(6)   |
| O(1)-Yb(1)-O(1)#2   | 79.98(6)   |
| O(1)#1-Yb(1)-O(2)   | 84.05(6)   |
| O(1)-Yb(1)-O(2)     | 129.98(6)  |
| O(1)#2-Yb(1)-O(2)   | 142.66(5)  |
| O(1)#1-Yb(1)-O(2)#1 | 129.98(6)  |
| O(1)-Yb(1)-O(2)#1   | 142.66(5)  |
| O(1)#2-Yb(1)-O(2)#1 | 84.05(6)   |
| O(2)-Yb(1)-O(2)#1   | 80.80(7)   |
| O(1)#1-Yb(1)-O(2)#2 | 142.66(5)  |
| O(1)-Yb(1)-O(2)#2   | 84.05(6)   |
| O(1)#2-Yb(1)-O(2)#2 | 129.98(6)  |
| O(2)-Yb(1)-O(2)#2   | 80.80(7)   |
| O(2)#1-Yb(1)-O(2)#2 | 80.80(7)   |
| O(1)#1-Yb(1)-N(2)#1 | 65.16(6)   |
| O(1)-Yb(1)-N(2)#1   | 138.53(6)  |
| O(1)#2-Yb(1)-N(2)#1 | 72.71(6)   |
| O(2)-Yb(1)-N(2)#1   | 69.95(6)   |
| O(2)#1-Yb(1)-N(2)#1 | 64.85(6)   |
| O(2)#2-Yb(1)-N(2)#1 | 137.41(7)  |
| O(1)#1-Yb(1)-N(2)   | 72.71(6)   |
| O(1)-Yb(1)-N(2)     | 65.16(6)   |
| O(1)#2-Yb(1)-N(2)   | 138.53(6)  |
| O(2)-Yb(1)-N(2)     | 64.85(6)   |
| O(2)#1-Yb(1)-N(2)   | 137.41(7)  |
| O(2)#2-Yb(1)-N(2)   | 69.95(6)   |
| N(2)#1-Yb(1)-N(2)   | 119.975(3) |
| O(1)#1-Yb(1)-N(2)#2 | 138.53(6)  |
| O(1)-Yb(1)-N(2)#2   | 72.71(6)   |
| O(1)#2-Yb(1)-N(2)#2 | 65.16(6)   |
| O(2)-Yb(1)-N(2)#2   | 137.41(7)  |
| O(2)#1-Yb(1)-N(2)#2 | 69.95(6)   |
| O(2)#2-Yb(1)-N(2)#2 | 64.85(6)   |
| N(2)#1-Yb(1)-N(2)#2 | 119.975(3) |
| N(2)-Yb(1)-N(2)#2   | 119.975(3) |
| O(1)#1-Yb(1)-C(9)#1 | 18.62(6)   |
| O(1)-Yb(1)-C(9)#1   | 97.83(6)   |
| O(1)#2-Yb(1)-C(9)#1 | 77.91(6)   |
| O(2)-Yb(1)-C(9)#1   | 76.34(6)   |

|                     |           |
|---------------------|-----------|
| O(2)#1-Yb(1)-C(9)#1 | 111.52(6) |
| O(2)#2-Yb(1)-C(9)#1 | 151.57(6) |
| N(2)#1-Yb(1)-C(9)#1 | 46.68(6)  |
| N(2)-Yb(1)-C(9)#1   | 85.03(6)  |
| N(2)#2-Yb(1)-C(9)#1 | 142.85(6) |
| O(1)#1-Yb(1)-C(9)#2 | 97.83(6)  |
| O(1)-Yb(1)-C(9)#2   | 77.91(6)  |
| O(1)#2-Yb(1)-C(9)#2 | 18.62(6)  |
| O(2)-Yb(1)-C(9)#2   | 151.57(6) |
| O(2)#1-Yb(1)-C(9)#2 | 76.34(6)  |
| O(2)#2-Yb(1)-C(9)#2 | 111.52(6) |
| N(2)#1-Yb(1)-C(9)#2 | 85.03(6)  |
| N(2)-Yb(1)-C(9)#2   | 142.85(6) |
| N(2)#2-Yb(1)-C(9)#2 | 46.68(6)  |
| C(9)#1-Yb(1)-C(9)#2 | 96.52(6)  |
| O(1)#1-Yb(1)-C(9)   | 77.91(6)  |
| O(1)-Yb(1)-C(9)     | 18.62(6)  |
| O(1)#2-Yb(1)-C(9)   | 97.83(6)  |
| O(2)-Yb(1)-C(9)     | 111.52(6) |
| O(2)#1-Yb(1)-C(9)   | 151.57(6) |
| O(2)#2-Yb(1)-C(9)   | 76.34(6)  |
| N(2)#1-Yb(1)-C(9)   | 142.85(6) |
| N(2)-Yb(1)-C(9)     | 46.68(6)  |
| N(2)#2-Yb(1)-C(9)   | 85.03(6)  |
| C(9)#1-Yb(1)-C(9)   | 96.52(6)  |
| C(9)#2-Yb(1)-C(9)   | 96.52(6)  |

Symmetry transformations used to generate equivalent atoms:

#1 -y+1,z,-x+1 #2 -z+1,-x+1,y #3 x,-y,-z+1

**Table S11.** Selected least-squares planes data (standard deviations are indicated within parentheses) and interplanar angles (deg) in  $[\text{LnL}_3]^{3+}$  (Ln(III) = Eu, Yb and **L** = (R,R)-1 and (S,S)-1).

|                               | Nr | Description            | Deviation (Å) | Max. | Atom | Interplanar Angles (deg) |            |
|-------------------------------|----|------------------------|---------------|------|------|--------------------------|------------|
|                               |    |                        |               |      |      | 1-2                      | 2-3        |
| $[\text{Eu}((R,R)-1)_3]^{3+}$ | 1  | N1-O1-C9-C10           | 0.0093(26)    |      | C9   | 5.86(0.12)               | 7.35(0.16) |
|                               | 2  | N2-C10-C11-C12-C13-C14 | -0.0055(26)   |      | C12  |                          |            |
|                               | 3  | N3-O2-C15-C14          | 0.0009(29)    |      | C15  |                          |            |
| $[\text{Eu}((S,S)-1)_3]^{3+}$ | 1  | N1-O1-C9-C10           | 0.0047(27)    |      | C9   | 4.24(0.14)               | 7.79(0.16) |
|                               | 2  | N2-C10-C11-C12-C13-C14 | -0.0116(28)   |      | C12  |                          |            |
|                               | 3  | N3-O2-C15-C14          | -0.0033(29)   |      | C15  |                          |            |
| $[\text{Yb}((R,R)-1)_3]^{3+}$ | 1  | N1-O1-C9-C10           | 0.0053(24)    |      | C9   | 4.16(0.12)               | 6.75(0.14) |
|                               | 2  | N2-C10-C11-C12-C13-C14 | -0.0072(20)   |      | C14  |                          |            |
|                               | 3  | N3-O2-C15-C14          | -0.0037(24)   |      | C15  |                          |            |
| $[\text{Yb}((S,S)-1)_3]^{3+}$ | 1  | N1-O1-C9-C10           | 0.0080(19)    |      | C9   | 3.88(0.10)               | 7.31(0.12) |
|                               | 2  | N2-C10-C11-C12-C13-C14 | 0.0137(19)    |      | C11  |                          |            |
|                               | 3  | N3-O2-C15-C14          | -0.0067(21)   |      | C15  |                          |            |

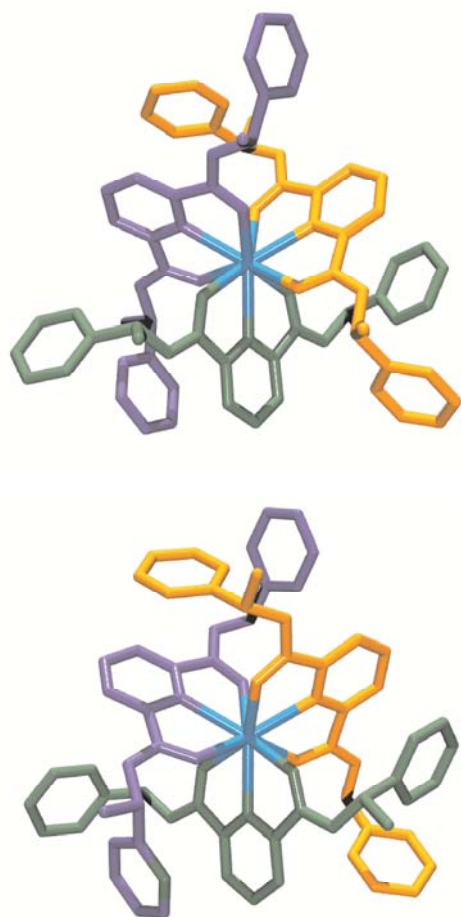

**Figure S9.** Structure of the  $\Lambda$ -[Gd((*R,R*)-1)<sub>3</sub>]<sup>3+</sup> (top) and  $\Delta$ -[Gd((*S,S*)-1)<sub>3</sub>]<sup>3+</sup> (bottom) cations.

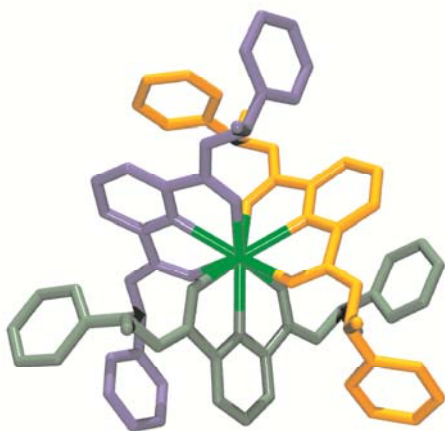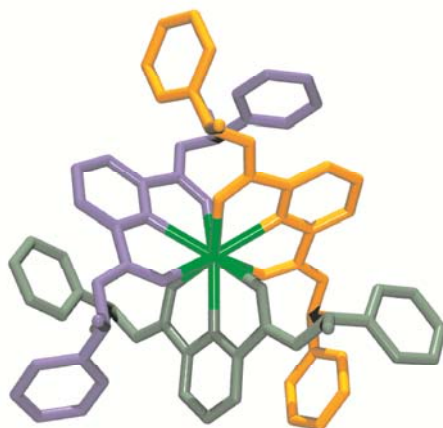

**Figure S10.** Structure of the  $\Lambda$ -[Tb((R,R)-1)<sub>3</sub>]<sup>3+</sup> (top) and  $\Delta$ -[Tb((S,S)-1)<sub>3</sub>]<sup>3+</sup> (bottom) cations.



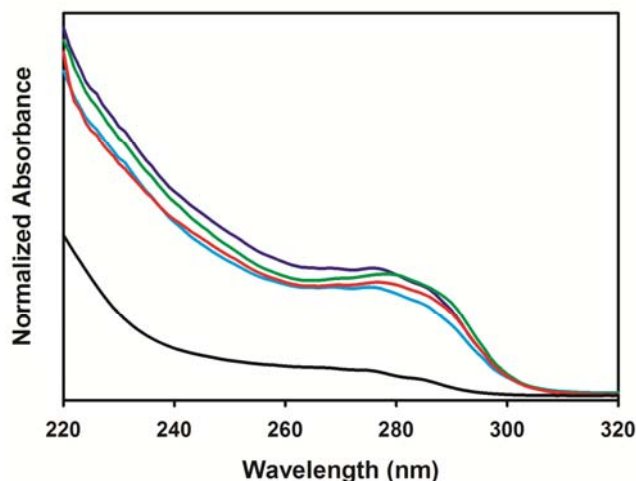

**Figure S11.** Normalized electronic spectra of **L** (black trace,  $5.4 \times 10^{-5}$  M) and  $[\text{LnL}_3]^{3+}$  (Ln(III) = Eu, Gd, Tb, and Er) complexes (blue, red, cyan, and green traces, respectively,  $2.8\text{--}4.5 \times 10^{-4}$  M) in anhydrous MeCN at 298 K.

### Luminescence Sensitization Determination

The luminescence sensitization ( $\eta_{\text{sens}}$ ) value was determined for the Eu(III) complex using the following equation<sup>1</sup>:

$$Q_{\text{tot}}^{\text{Eu}} = \eta_{\text{ISC}} \cdot \eta_{\text{ET}} \cdot Q^{\text{Eu}} = \eta_{\text{sens}} \cdot Q^{\text{Eu}}$$

where  $Q_{\text{tot}}^{\text{Eu}}$  is the europium-centered luminescence quantum yield obtained upon ligand excitation (1.0%),  $Q^{\text{Eu}}$  the intrinsic luminescence quantum yield of the Eu(III) ion,  $\eta_{\text{sens}}$  the efficiency of the luminescence sensitization by the ligand,  $\eta_{\text{ISC}}$  the efficiency of the intersystem crossing process from the ligand singlet to triplet state, and  $\eta_{\text{ET}}$  the efficiency of the ligand-to-metal energy transfer. The intrinsic quantum yield  $Q^{\text{Eu}}$  is defined as the ratio between the observed and radiative lifetimes of the  $\text{Eu}(^5\text{D}_0)$  level:

$$Q^{\text{Eu}} = \tau_{\text{obs}}/\tau_{\text{R}}$$

where the radiative lifetime  $\tau_R$  can be estimated from:

$$\tau_R = \frac{1}{A_{MD,0} \cdot n^3} \cdot \left( \frac{I_{MD}}{I_{tot}} \right)$$

$A_{MD,0}$  is the spontaneous emission probability of the  $\text{Eu}(^5\text{D}_0 \rightarrow ^7\text{F}_1)$  transition ( $14.65 \text{ s}^{-1}$ ),  $n$  is the refractive index (1.354 for the MeCN solution) and  $I_{MD}/I_{tot}$  is the intensity ratio of the  $\text{Eu}(^5\text{D}_0 \rightarrow ^7\text{F}_1)$  transition to the total emission of the  $^5\text{D}_0$  level. For  $[\text{EuL}_3]^{3+}$  with  $\mathbf{L} = (R,R)\text{-1}$  or  $(S,S)\text{-1}$ ,  $I_{MD}/I_{tot} = 0.24$ , leading to  $\tau_R = 6.6 \times 10^{-3} \text{ ms}$ ,  $Q^{\text{Eu}} = 265.2$  ( $\tau_{\text{obs}} = 1.75 \text{ ms}$ ) and  $\eta_{\text{sens}} = 4.0 \times 10^{-5}$ . As a comparison,  $\eta_{\text{sens}}$  values of 0.03 ( $Q^{\text{Eu}}_{\text{L}} = 1.4\%$ ),  $7.0 \times 10^{-4}$  ( $Q^{\text{Eu}}_{\text{L}} = 0.01\%$ ), and in the range of 0.01–0.02 ( $Q^{\text{Eu}}_{\text{L}} \sim 1\%$ ) have been obtained for Eu(III) 1:1 and 1:2 complexes with the chiral ligand 2,6-bis(1-*S*-neopentylbenzimidazol-2-yl)pyridine,<sup>2</sup> and for Eu(III) 1:1 complexes with nitrobenzoic acid ligand derivatives,<sup>3</sup> respectively.

## References

- (1) Wertz, M. H. V.; Jukes, R. T. F.; Verhoeven, J. W. *Phys. Chem.* **1985**, *89*, 5649–5654
- (2) Muller, G.; Maupin, C. L.; Riehl, J. P.; Birkedal, H.; Piguet, C.; Bünzli, J.-C. G. *Eur. J. Inorg. Chem.* **2003**, 4065–4072
- (3) de Bettencourt-Dias, A.; Viswanathan, S *Dalton Trans.*, **2006**, 4093–4103
